# Supplementary material for: Inferring the ecological niche of bat viruses closely related to SARS-CoV-2 using phylogeographic analyses of Rhinolophus species
Source: PubMed Central journal article supplement (PMC8275577; doi:10.1038/s41598-021-93738-z), 2021-07-12

## **Supplementary Information**

**Supplementary Table S1.** Cytochrome c oxidase subunit 1 (CO1) haplotypes of *Rhinolophus* species analysed in this study

**Supplementary Table S2.** Geographic records used to infer the ecological niche of bat viruses related to SARS-CoV.

**Supplementary Figure S1.** Model performance in geographic space on training data. Ecological niche of bat viruses related to SARS-CoV (SCoVrCs).

**Supplementary Figure S2.** Model performance in geographic space on training data. Ecological niches of bat viruses closely related to SARS-CoV-2 (SCoV2rCs) predicted using 4 points (data set A).

**Supplementary Figure S3.** Model performance in geographic space on training data. Ecological niches of bat viruses closely related to SARS-CoV-2 (SCoV2rCs) predicted using 21 points (data set B).

**Table S1. Cytochrome c oxidase subunit 1 (COI) haplotypes of *Rhinolophus* species analysed in this study.**

| Species              | GenBank accession numbers                                              | Haplotypes | Country   | Location                                           | Code | Latitude | Longitude | References  | EN datasets                    |
|----------------------|------------------------------------------------------------------------|------------|-----------|----------------------------------------------------|------|----------|-----------|-------------|--------------------------------|
| <i>R. acuminatus</i> | MW712895, MW712896                                                     | Rac1       | Cambodia  | Krong Preah Vihear                                 | C2   | 13.7641  | 104.8592  | This study  | 20 points, 30 points           |
| <i>R. acuminatus</i> | MW712894                                                               | Rac1       | Cambodia  | near Kok Lak, Rattanakiri                          | C4   | 14.0186  | 106.7484  | This study  | 20 points, 30 points           |
| <i>R. acuminatus</i> | MW712891-MW712893                                                      | Rac1       | Cambodia  | Virachey                                           | C5   | 14.2032  | 107.0050  | This study  | 20 points, 30 points           |
| <i>R. acuminatus</i> | MW712897                                                               | Rac1       | Cambodia  | Mondolkiri                                         | C6   | 12.1803  | 106.9819  | This study  | 20 points, 30 points           |
| <i>R. acuminatus</i> | MW712898- MW712900                                                     | Rac2       | Cambodia  | Mondolkiri                                         | C6   | 12.1803  | 106.9819  | This study  | 20 points, 30 points           |
| <i>R. acuminatus</i> | HM541312, HM541313, HM541317, HM541318                                 | Rac1       | Laos      | Dong Hua Sao                                       | L10  | 14.8220  | 106.0600  | [1]         | 20 points, 30 points           |
| <i>R. acuminatus</i> | HM541319, HM541320, HM541321, HM541322, HM541323, HM541324, HM541314   | Rac1       | Laos      | Dong Kanthung                                      | L11  | 14.1750  | 105.5750  | [1]         | 20 points, 30 points           |
| <i>R. acuminatus</i> | HM541315                                                               | Rac6       | Laos      | Dong Hua Sao                                       | L10  | 14.8220  | 106.0600  | [1]         | 30 points                      |
| <i>R. acuminatus</i> | HM541310, HM541311                                                     | Rac3       | Malaysia  | Tabin                                              | M5   | 5.0830   | 118.6670  | [1]         |                                |
| <i>R. acuminatus</i> | SRR13380249, SRR13380251                                               | Rac1       | Thailand  | Khao Ang Rue Nai                                   | T4   | 13.2067  | 101.7119  | [2]         | 4 points, 20 points, 30 points |
| <i>R. acuminatus</i> | SRR13380250                                                            | Rac2       | Thailand  | Khao Ang Rue Nai                                   | T4   | 13.2067  | 101.7119  | [2]         | 4 points, 20 points, 30 points |
| <i>R. acuminatus</i> | SRR13380247                                                            | Rac4       | Thailand  | Khao Ang Rue Nai                                   | T4   | 13.2067  | 101.7119  | [2]         | 4 points, 20 points, 30 points |
| <i>R. acuminatus</i> | SRR13380248                                                            | Rac5       | Thailand  | Khao Ang Rue Nai                                   | T4   | 13.2067  | 101.7119  | [2]         | 4 points, 20 points, 30 points |
| <i>R. acuminatus</i> | HM541316                                                               | Rac1       | Vietnam   | Yok Don NP                                         | V13  | 12.8670  | 107.7000  | [1]         | 20 points, 30 points           |
| <i>R. acuminatus</i> | HM914924, HM914925                                                     | Rac1       | Vietnam   | Bu Gia Map                                         | V14  | 12.1940  | 107.2060  | [2]         |                                |
| <i>R. acuminatus</i> | HM541325, HM914901, HM914902, HM914913, HM914914                       | Rac1       | Vietnam   | Cat Tien                                           | V17  | 11.4170  | 107.4330  | [1]         | 20 points, 30 points           |
| <i>R. affinis</i>    | MW712901- MW712909                                                     | Ra1        | Cambodia  | Preah Vihear Temple                                | C1   | 14.3594  | 104.7859  | This study  |                                |
| <i>R. affinis</i>    | MW712910- MW712912                                                     | Ra1        | Cambodia  | Virachey                                           | C5   | 14.2032  | 107.0050  | This study  |                                |
| <i>R. affinis</i>    | MW712913, MW712914                                                     | Ra2        | Cambodia  | Virachey                                           | C5   | 14.2032  | 107.0050  | This study  |                                |
| <i>R. affinis</i>    | MW712915- MW712921                                                     | Ra3        | Cambodia  | Virachey                                           | C5   | 14.2032  | 107.0050  | This study  | 30 points                      |
| <i>R. affinis</i>    | MW712922                                                               | Ra4        | Cambodia  | Virachey                                           | C5   | 14.2032  | 107.0050  | This study  |                                |
| <i>R. affinis</i>    | HM541383, HM541387                                                     | Ra3        | China     | Guangxi, Jing Xin County Provincial Nature Reserve | Ch4  | 23.1170  | 105.9670  | [1]         | 30 points                      |
| <i>R. affinis</i>    | HM541347, HM541348, HM541353                                           | Ra3        | China     | Guangxi, Shiwandashan National Reserve             | Ch5  | 21.8460  | 107.8890  | [1]         | 30 points                      |
| <i>R. affinis</i>    | SRR11085797                                                            | Ra5        | China     | Mojiang                                            | Ch1  | 23.4319  | 101.6924  | [3]         | 4 points, 20 points, 30 points |
| <i>R. affinis</i>    | HM541342, HM541343-6, HM541377-82, HM541384-6, HM541388-90, HM541392-4 | Ra6        | China     | Guangxi, Jing Xin County Provincial Nature Reserve | Ch4  | 23.1170  | 105.9670  | [1]         |                                |
| <i>R. affinis</i>    | HM541349, HM541350-2, HM541354-9, HM541368-76                          | Ra6        | China     | Guangxi, Shiwandashan National Reserve             | Ch5  | 21.8460  | 107.8890  | [1]         |                                |
| <i>R. affinis</i>    | HM541391                                                               | Ra7        | China     | Guangxi, Jing Xin County Provincial Nature Reserve | Ch4  | 23.1170  | 105.9670  | [1]         |                                |
| <i>R. affinis</i>    | JF444035                                                               | Ra8        | China     | Shuhuangshan Reserve                               | Ch6  | 26.4167  | 111.0330  | unpublished |                                |
| <i>R. affinis</i>    | KP192694                                                               | Ra16       | Indonesia | Sumatra                                            | I1   | -4.5597  | 105.4068  | [4]         |                                |
| <i>R. affinis</i>    | KP192693                                                               | Ra17       | Indonesia | Sumatra                                            | I1   | -4.5597  | 105.4068  | [4]         |                                |
| <i>R. affinis</i>    | HM541335                                                               | Ra1        | Laos      | Dong Hua Sao                                       | L10  | 14.8220  | 106.0600  | [1]         |                                |
| <i>R. affinis</i>    | HM541336, HM541341                                                     | Ra10       | Laos      | Xiangkhoang, Nam Et NBCA                           | L2   | 20.0730  | 103.4330  | [1]         |                                |
| <i>R. affinis</i>    | HM541339, HM541340                                                     | Ra3        | Laos      | LouangNamtha                                       | L1   | 20.7360  | 101.1670  | [1]         | 30 points                      |

|                   |                                           |      |          |                                    |     |         |          |                              |           |
|-------------------|-------------------------------------------|------|----------|------------------------------------|-----|---------|----------|------------------------------|-----------|
| <i>R. affinis</i> | HM541334                                  | Ra3  | Laos     | Dong Hua Sao                       | L10 | 14.8220 | 106.0600 | [1]                          | 30 points |
| <i>R. affinis</i> | HM541366, HM541367                        | Ra3  | Laos     | TakLeuk                            | L5  | 18.3830 | 103.0670 | [1]                          | 30 points |
| <i>R. affinis</i> | HM541333                                  | Ra3  | Laos     | Attapeu                            | L9  | 14.9500 | 107.1330 | [1]                          | 30 points |
| <i>R. affinis</i> | HM541365                                  | Ra9  | Laos     | TakLeuk                            | L5  | 18.3830 | 103.0670 | [1]                          |           |
| <i>R. affinis</i> | HM541337, HM541338                        | Ra11 | Malaysia | Cameron Highlands                  | M1  | 4.4600  | 101.3800 | [1]                          |           |
| <i>R. affinis</i> | HM541330                                  | Ra11 | Malaysia | Kuala Lompat                       | M2  | 3.7170  | 102.1670 | [1]                          |           |
| <i>R. affinis</i> | HM541331, HM541332                        | Ra11 | Malaysia | Pasoh Forest                       | M3  | 2.9670  | 102.3000 | [1]                          |           |
| <i>R. affinis</i> | HM541411, HM541412, HM541413, HM541407-10 | Ra11 | Malaysia | Endau Rompin                       | M4  | 2.5330  | 103.4000 | [1]                          |           |
| <i>R. affinis</i> | HM541414                                  | Ra12 | Malaysia | Endau Rompin                       | M4  | 2.5330  | 103.4000 | [1]                          |           |
| <i>R. affinis</i> | MK410386                                  | Ra13 | Myanmar  | Chin                               | B1  | 22.8065 | 93.6998  | [5]                          |           |
| <i>R. affinis</i> | HM541326                                  | Ra14 | Myanmar  | Nyaungshwe                         | B5  | 20.6630 | 96.9670  | [1]                          |           |
| <i>R. affinis</i> | KP192682                                  | Ra15 | Myanmar  | Kadan                              | B6  | 12.4739 | 98.4032  | [4]                          |           |
| <i>R. affinis</i> | KY034102, KY034135                        | Ra1  | Thailand | Loei                               | T2  | 17.5050 | 100.9380 | unpublished                  |           |
| <i>R. affinis</i> | KP192677, KP192678                        | Ra11 | Thailand | Khuan Kalong                       | T5  | 7.0129  | 100.0210 | [4]                          |           |
| <i>R. affinis</i> | KY034109                                  | Ra11 | Thailand | Songkla                            | T6  | 6.9940  | 100.1490 | unpublished                  |           |
| <i>R. affinis</i> | KP192673, KP192675, KP192676              | Ra11 | Thailand | Hala Bala                          | T7  | 5.7983  | 101.8250 | [4]                          |           |
| <i>R. affinis</i> | KY034138                                  | Ra18 | Thailand | Loei                               | T2  | 17.5050 | 100.9380 | unpublished                  |           |
| <i>R. affinis</i> | KP192689, KP192690, KP192691              | Ra19 | Thailand | Adang                              | T6  | 6.5146  | 99.3173  | [4]                          |           |
| <i>R. affinis</i> | KY034134                                  | Ra20 | Thailand | Songkla                            | T6  | 6.9940  | 100.1490 | unpublished                  |           |
| <i>R. affinis</i> | KP192687, KP192688                        | Ra21 | Thailand | Chieng Mai                         | T1  | 19.5093 | 98.8326  | [4]                          |           |
| <i>R. affinis</i> | KP192679, KP192680, KP192681              | Ra22 | Thailand | KhuanKalong                        | T5  | 7.0129  | 100.0210 | [4]                          |           |
| <i>R. affinis</i> | KP192692, KY034116, KY034119              | Ra22 | Thailand | Adang                              | T6  | 6.5146  | 99.3173  | [4]                          |           |
| <i>R. affinis</i> | KP192674                                  | Ra23 | Thailand | Hala Bala                          | T7  | 5.7983  | 101.8250 | [4]                          |           |
| <i>R. affinis</i> | HM541360                                  | Ra1  | Vietnam  | Ngoc Linh, Quang Nam               | V11 | 15.2088 | 107.7395 | [1]                          |           |
| <i>R. affinis</i> | HM541363                                  | Ra1  | Vietnam  | Cat Tien                           | V17 | 11.4170 | 107.4330 | [1]                          |           |
| <i>R. affinis</i> | MW712923                                  | Ra1  | Vietnam  | Huong Hoa                          | V9  | 16.9370 | 106.5810 | This study                   |           |
| <i>R. affinis</i> | MW712924, MW712925, HM541399, HQ580330    | Ra24 | Vietnam  | Tram Ton, Sapa                     | V1  | 22.3278 | 103.7792 | This study, [1], unpublished |           |
| <i>R. affinis</i> | MW712926                                  | Ra25 | Vietnam  | Hanoi, Ba Vi National park         | V4  | 21.0830 | 105.3730 | This study                   |           |
| <i>R. affinis</i> | MW712927-MW712929                         | Ra26 | Vietnam  | Hanoi, Ba Vi National park         | V4  | 21.0830 | 105.3730 | This study                   |           |
| <i>R. affinis</i> | MW712930, HM541402                        | Ra27 | Vietnam  | Ngoc Linh, Kon Tum                 | V11 | 15.2088 | 107.7395 | This study, [1]              |           |
| <i>R. affinis</i> | MW712931                                  | Ra28 | Vietnam  | Ngoc Linh, Kon Tum                 | V11 | 15.2088 | 107.7395 | This study                   |           |
| <i>R. affinis</i> | MW712932                                  | Ra29 | Vietnam  | Kon Tum, Chu Mom Ray               | V12 | 14.4250 | 107.7860 | This study                   |           |
| <i>R. affinis</i> | MW712933                                  | Ra3  | Vietnam  | Dakrong                            | V10 | 16.6000 | 106.8667 | This study                   | 30 points |
| <i>R. affinis</i> | KP192684                                  | Ra3  | Vietnam  | Vinh Phuc, Tam Dao National Park   | V2  | 21.5075 | 105.6082 | [6]                          | 30 points |
| <i>R. affinis</i> | MW712934- MW712936                        | Ra3  | Vietnam  | Hanoi, Ba Vi National park         | V4  | 21.0830 | 105.3730 | This study                   | 30 points |
| <i>R. affinis</i> | MW712937                                  | Ra3  | Vietnam  | Thanh Hoa, Ba Thuoc                | V5  | 20.4600 | 105.2520 | This study                   | 30 points |
| <i>R. affinis</i> | MW712938                                  | Ra3  | Vietnam  | Thanh Hoa, Pu Luong Nature Reserve | V6  | 20.3050 | 105.0120 | This study                   | 30 points |
| <i>R. affinis</i> | MW712939-MW712942                         | Ra3  | Vietnam  | Vu Quang                           | V8  | 18.3200 | 105.4360 | This study                   | 30 points |

Table S1 - 2 / 4

|                     |                                                    |      |          |                                  |     |         |          |                  |                                |
|---------------------|----------------------------------------------------|------|----------|----------------------------------|-----|---------|----------|------------------|--------------------------------|
| <i>R. affinis</i>   | MW712943-MW712945                                  | Ra3  | Vietnam  | Huong Hoa                        | V9  | 16.9370 | 106.5810 | This study       | 30 points                      |
| <i>R. affinis</i>   | HM541398, HQ580331                                 | Ra30 | Vietnam  | Sapa, Hoang Lien NP              | V1  | 22.3278 | 103.7792 | [1], unpublished |                                |
| <i>R. affinis</i>   | HM541364                                           | Ra31 | Vietnam  | Lao Cai, Ta Phinh                | V1  | 22.3278 | 103.7792 | [1]              | 30 points                      |
| <i>R. affinis</i>   | KP192683                                           | Ra32 | Vietnam  | Vinh Phuc, Tam Dao National Park | V2  | 21.5075 | 105.6082 | [4]              |                                |
| <i>R. affinis</i>   | MW712946, HM541395, HM541401                       | Ra33 | Vietnam  | Ngoc Linh, Quang Nam             | V11 | 15.2088 | 107.7395 | [1]              | 30 points                      |
| <i>R. affinis</i>   | GU684791, GU684792-4, GU684798, GU684801, HM541327 | Ra34 | Vietnam  | Bi Doup-Nui Ba                   | V15 | 12.1790 | 108.6790 | [1], unpublished |                                |
| <i>R. affinis</i>   | HM541396                                           | Ra35 | Vietnam  | Xuan Truong                      | V16 | 11.8670 | 108.5500 | [1]              | 30 points                      |
| <i>R. affinis</i>   | HM541361                                           | Ra36 | Vietnam  | Cat Tien                         | V17 | 11.4170 | 107.4330 | [1]              |                                |
| <i>R. affinis</i>   | HM541362                                           | Ra37 | Vietnam  | Cat Tien                         | V17 | 11.4170 | 107.4330 | [1]              |                                |
| <i>R. affinis</i>   | HM541328                                           | Ra38 | Vietnam  | Vu Quang                         | V8  | 18.3200 | 105.4360 | [1]              |                                |
| <i>R. affinis</i>   | HM541329                                           | Ra39 | Vietnam  | Vu Quang                         | V8  | 18.3200 | 105.4360 | [1]              |                                |
| <i>R. affinis</i>   | KP192685, KP192686                                 | Ra6  | Vietnam  | Vinh Phuc, Tam Dao National Park | V2  | 21.5075 | 105.6082 | [4]              |                                |
| <i>R. affinis</i>   | MW712947                                           | Ra6  | Vietnam  | Phu Tho, Xuan Son                | V3  | 21.1386 | 104.9399 | This study       |                                |
| <i>R. affinis</i>   | MW712948-MW712957                                  | Ra6  | Vietnam  | Hanoi, Ba Vi National park       | V4  | 21.0830 | 105.3730 | This study       |                                |
| <i>R. malayanus</i> | MW712958                                           | Rm1  | Cambodia | Preah Vihear Temple              | C1  | 14.3594 | 104.7859 | This study       | 20 points, 30 points           |
| <i>R. malayanus</i> | MW712959                                           | Rm2  | Cambodia | Krong Preah Vihear               | C2  | 13.7641 | 104.8592 | This study       |                                |
| <i>R. malayanus</i> | MW712960                                           | Rm3  | Cambodia | Kampot                           | C8  | 10.5597 | 104.2822 | This study       | 4 points, 20 points, 30 points |
| <i>R. malayanus</i> | MK900704, MK900705                                 | Rm4  | China    | Yunnan                           | Ch2 | 21.8896 | 101.2979 | [7]              |                                |
| <i>R. malayanus</i> | SRR12432009                                        | Rm4  | China    | Mengla County                    | Ch3 | 21.9189 | 101.2716 | [8]              | 30 points                      |
| <i>R. malayanus</i> | MK900706                                           | Rm5  | China    | Yunnan                           | Ch2 | 21.8896 | 101.2979 | [7]              |                                |
| <i>R. malayanus</i> | HM541621                                           | Rm10 | Laos     | Hin Nam No                       | L8  | 17.5670 | 105.8330 | [1]              | 30 points                      |
| <i>R. malayanus</i> | HM541622                                           | Rm11 | Laos     | Hin Nam No                       | L8  | 17.5670 | 105.8330 | [1]              |                                |
| <i>R. malayanus</i> | HM541610                                           | Rm12 | Laos     | Dong Hua Sao                     | L10 | 14.8220 | 106.0600 | [1]              | 30 points                      |
| <i>R. malayanus</i> | HM541606, HM541607, HM541608, HM541609             | Rm2  | Laos     | Attapeu                          | L9  | 14.9500 | 107.1330 | [1]              |                                |
| <i>R. malayanus</i> | HM541613                                           | Rm4  | Laos     | LouangNamtha                     | L1  | 20.7360 | 101.1670 | [1]              | 20 points, 30 points           |
| <i>R. malayanus</i> | MW712961                                           | Rm4  | Laos     | Nam Khan                         | L3  | 19.6823 | 102.3377 | This study       |                                |
| <i>R. malayanus</i> | HM541614, HM541615, HM541616                       | Rm6  | Laos     | TakLeuk                          | L5  | 18.3830 | 103.0670 | [1]              | 30 points                      |
| <i>R. malayanus</i> | HM541619                                           | Rm7  | Laos     | TakLeuk                          | L5  | 18.3830 | 103.0670 | [1]              |                                |
| <i>R. malayanus</i> | HM541620                                           | Rm8  | Laos     | TakLeuk                          | L5  | 18.3830 | 103.0670 | [1]              | 30 points                      |
| <i>R. malayanus</i> | HM541618                                           | Rm9  | Laos     | Ban Pomkhoun-Phonsong            | L7  | 17.6330 | 104.9500 | [1]              |                                |
| <i>R. malayanus</i> | HM541624, HM541617, HM541623                       | Rm9  | Laos     | Hin Nam No                       | L8  | 17.5670 | 105.8330 | [1]              | 30 points                      |
| <i>R. malayanus</i> | KX099327, KX099330                                 | Rm13 | Myanmar  | NA                               | B2  | 22.0476 | 95.9993  | [9]              |                                |
| <i>R. malayanus</i> | HM541612                                           | Rm13 | Myanmar  | NA                               | B3  | 22.1000 | 96.6200  | [1]              | 30 points                      |
| <i>R. malayanus</i> | KX099328, KX099329                                 | Rm14 | Myanmar  | NA                               | B2  | 22.0476 | 95.9993  | [9]              |                                |
| <i>R. malayanus</i> | KX099331                                           | Rm15 | Myanmar  | NA                               | B2  | 22.0476 | 95.9993  | [9]              | 30 points                      |
| <i>R. malayanus</i> | KX099332                                           | Rm16 | Myanmar  | NA                               | B2  | 22.0476 | 95.9993  | [9]              |                                |
| <i>R. malayanus</i> | HM541611                                           | Rm17 | Myanmar  | NA                               | B4  | 22.4690 | 96.9930  | [1]              | 30 points                      |
| <i>R. malayanus</i> | MW712962                                           | Rm19 | Thailand | Kanchanaburi                     | T3  | 14.4500 | 98.8500  | This study       |                                |
| <i>R. malayanus</i> | MW712966-MW712971                                  | Rm1  | Vietnam  | Dakrong                          | V10 | 16.6000 | 106.8667 | This study       | 30 points                      |
| <i>R. malayanus</i> | MW712963                                           | Rm1  | Vietnam  | Ngoc Lac                         | V7  | 20.0944 | 105.3797 | This study       |                                |
| <i>R. malayanus</i> | MW712964                                           | Rm1  | Vietnam  | Huong Hoa                        | V9  | 16.9370 | 106.5810 | This study       |                                |

Table S1 - 3 / 4

|                     |                                        |      |          |                     |     |         |          |                  |                                |
|---------------------|----------------------------------------|------|----------|---------------------|-----|---------|----------|------------------|--------------------------------|
| <i>R. malayanus</i> | MW712965                               | Rm2  | Vietnam  | Dakrong             | V10 | 16.6000 | 106.8667 | This study       |                                |
| <i>R. malayanus</i> | HM541604                               | Rm20 | Vietnam  | Phu Quoc            | V18 | 10.2000 | 104.0000 | [1]              |                                |
| <i>R. shameli</i>   | MW712972-MW712981                      | Rsh1 | Cambodia | Preah Vihear Temple | C1  | 14.3594 | 104.7859 | This study       | 20 points, 30 points           |
| <i>R. shameli</i>   | MW712982, MW712983                     | Rsh1 | Cambodia | Krong Preah Vihear  | C2  | 13.7641 | 104.8592 | This study       | 20 points, 30 points           |
| <i>R. shameli</i>   | MW712984-MW713001                      | Rsh1 | Cambodia | SroLav              | C3  | 13.7914 | 105.6022 | This study       | 4 points, 20 points, 30 points |
| <i>R. shameli</i>   | MW713002-MW713030                      | Rsh1 | Cambodia | Virachey            | C5  | 14.2032 | 107.0050 | This study       | 20 points, 30 points           |
| <i>R. shameli</i>   | MW713031                               | Rsh2 | Cambodia | Preah Vihear Temple | C1  | 14.3594 | 104.7859 | This study       | 30 points                      |
| <i>R. shameli</i>   | MW713032                               | Rsh3 | Cambodia | Krong Preah Vihear  | C2  | 13.7641 | 104.8592 | This study       | 30 points                      |
| <i>R. shameli</i>   | HM541778                               | Rsh4 | Cambodia | KaohKong            | C7  | 11.6390 | 103.5740 | [1]              |                                |
| <i>R. shameli</i>   | MW713033, MW713034                     | Rsh5 | Cambodia | Kampot              | C8  | 10.5597 | 104.2822 | This study       |                                |
| <i>R. shameli</i>   | HM541782, HM541783, HM541784, HM541793 | Rsh1 | Laos     | Dong Hua Sao        | L10 | 14.8220 | 106.0600 | [1]              | 20 points, 30 points           |
| <i>R. shameli</i>   | HM541785                               | Rsh1 | Laos     | Nam Kading          | L4  | 18.8420 | 104.5830 | [1]              | 20 points, 30 points           |
| <i>R. shameli</i>   | HM541786                               | Rsh1 | Laos     | Vientiane           | L6  | 18.0830 | 102.6670 | [1]              | 20 points, 30 points           |
| <i>R. shameli</i>   | HM541780, HM541781, HM541792, JF444101 | Rsh1 | Laos     | near Hin Nam No     | L8  | 17.5670 | 105.8330 | [1], unpublished | 20 points, 30 points           |
| <i>R. shameli</i>   | HM541788, HM541789, HM541790, HM541791 | Rsh1 | Laos     | Attapeu             | L9  | 14.9500 | 107.1330 | [1]              | 20 points, 30 points           |
| <i>R. shameli</i>   | HM541787, HM541794                     | Rsh6 | Laos     | Dong Kanthung       | L11 | 14.1750 | 105.5750 | [1]              | 30 points                      |
| <i>R. shameli</i>   | HM541779                               | Rsh7 | Laos     | near Hin Nam No     | L8  | 17.5670 | 105.8330 | [1]              | 30 points                      |
| <i>R. shameli</i>   | HM541777                               | Rsh5 | Vietnam  | PhuQuoc             | V18 | 10.2000 | 104.0000 | [1]              |                                |

## References

- Francis, C.M. *et al.* The role of DNA barcodes in understanding and conservation of mammal diversity in Southeast Asia. *PLoS ONE* **5**, E12575; doi:10.1371/journal.pone.0012575 (2010).
- Wacharapluesadee, S. *et al.* Evidence for SARS-CoV-2 related coronaviruses circulating in bats and pangolins in Southeast Asia. *Nat. Commun.* **12**, 972; doi:10.1038/s41467-021-21240-1 (2021).
- Zhou, P. *et al.* A pneumonia outbreak associated with a new coronavirus of probable bat origin. *Nature* **579**, 270-273; doi:10.1038/s41586-020-2012-7 (2020).
- Ith, S. *et al.* Geographical Variation of *Rhinolophus affinis* (Chiroptera: Rhinolophidae) in the Sundaic Subregion of Southeast Asia, including the Malay Peninsula, Borneo and Sumatra. *Acta Chiropterol.* **18**, 141-161; doi:10.3161/15081109ACC2016.18.1.006 (2016).
- Arai, S. *et al.* Molecular Phylogeny of Mobatviruses (Hantaviridae) in Myanmar and Vietnam. *Viruses* **11**, 228; doi:10.3390/v11030228 (2019).
- Ith, S. *et al.* Taxonomic implications of geographical variation in *Rhinolophus affinis* (Chiroptera: Rhinolophidae) in mainland Southeast Asia. *Zool. Stud.* **54**, e31; doi:10.1186/s40555-015-0109-8 (2015).
- Liang, J.; He, X.; Peng, X.; Xie, H.; Zhang, L. First record of existence of *Rhinolophus malayanus* (Chiroptera, Rhinolophidae) in China. *Mammalia* **84**, 362-365; doi:10.1515/mammalia-2019-0062 (2020).
- Zhou, H. *et al.* A novel bat coronavirus closely related to SARS-CoV-2 contains natural insertions at the S1/S2 cleavage site of the spike protein. *Curr. Biol.* **30**, 3896; doi:10.1016/j.cub.2020.09.030 (2020).
- Soisook, P *et al.* Hill forest dweller: A new cryptic species of *Rhinolophus* in the 'pusillus group' (Chiroptera: Rhinolophidae) from Thailand and Lao PDR. *Acta Chiropt.* **18**, 117-139; doi:10.3161/15081109ACC2016.18.1.005 (2016).

**Table S2. Geographic records used to infer the ecological niche of bat viruses related to SARS-CoV.**

| Country | locality              | Latitude | Longitude | References |
|---------|-----------------------|----------|-----------|------------|
| China   | Guangdong             | 22.65334 | 113.05734 | [1,2]      |
| China   | Guangxi, Nanning      | 22.81700 | 108.36653 | [1,3]      |
| China   | Guizhou, Anlong       | 25.09900 | 105.44269 | [4]        |
| China   | Hebei                 | 38.71913 | 114.80067 | [1,2]      |
| China   | Henan, Jiyuan         | 35.06725 | 112.60192 | [1,4]      |
| China   | Hong Kong             | 22.37425 | 114.08477 | [5]        |
| China   | Hong Kong             | 22.42819 | 114.06778 | [5]        |
| China   | Hubei, Yichang        | 30.69197 | 111.28647 | [3]        |
| China   | Jilin, Tonghua county | 41.67981 | 125.75925 | [1,6]      |
| China   | Shaanxi               | 33.99589 | 107.48343 | [1,2]      |
| China   | Shanxi                | 37.27425 | 111.24516 | [1,2]      |
| China   | Yunnan, Baoshan       | 25.11206 | 99.16175  | [7]        |
| China   | Yunnan, Kunming       | 24.88008 | 102.83289 | [7-9]      |
| China   | Yunnan, Lufeng        | 25.15011 | 102.07903 | [10]       |
| China   | Yunnan, Mangshi       | 24.43369 | 98.58808  | [11]       |
| China   | Yunnan, Menglian      | 22.32911 | 99.58417  | [6]        |
| China   | Zhejiang, Longquan    | 28.07464 | 119.14147 | [4]        |
| China   | Zhejiang, Daishan     | 30.26671 | 122.22394 | [1,12]     |
| Korea   | Jeongbuk              | 35.42772 | 127.13625 | [13,14]    |

## References

1. Wu, Z. *et al.* Deciphering the bat virome catalog to better understand the ecological diversity of bat viruses and the bat origin of emerging infectious diseases. *The ISME journal* **10**, 609-620; doi:10.1038/ismej.2015.138 (2016).
2. Fan, Y.; Zhao, K.; Shi, Z. L.; Zhou, P. Bat coronaviruses in China. *Viruses* **11**, 210; doi:10.3390/v11030210 (2019).
3. Li, W. *et al.* Bats are natural reservoirs of SARS-like coronaviruses. *Science* **310**, 676-679; doi:10.1126/science.1118391 (2005).
4. Lin, X.D. *et al.* Extensive diversity of coronaviruses in bats from China. *Virology* **507**, 1-10; doi:10.1016/j.virol.2017.03.019 (2017).
5. Lau, S.K. *et al.* Severe acute respiratory syndrome coronavirus-like virus in Chinese horseshoe bats. *Proc. Natl. Acad. Sci. U.S.A.* **102**, 14040-14045; doi:10.1073/pnas.0506735102 (2005).
6. Xu, L. *et al.* Detection and characterization of diverse alpha- and betacoronaviruses from bats in China. *Virol. Sin.* **31**, 69-77; doi:10.1007/s12250-016-3727-3 (2016).
7. Ge, X.Y. *et al.* Isolation and characterization of a bat SARS-like coronavirus that uses the ACE2 receptor. *Nature* **503**, 535-538; doi:10.1038/nature12711 (2013).
8. He, B. *et al.* Identification of diverse alphacoronaviruses and genomic characterization of a novel severe acute respiratory syndrome-like coronavirus from bats in China. *J. Virol.* **88**, 7070-7082; doi:10.1128/JVI.00631-14 (2014).
9. Hu, B. *et al.* Discovery of a rich gene pool of bat SARS-related coronaviruses provides new insights into the origin of SARS coronavirus. *PLoS Pathog.* **13**, e1006698; doi:10.1371/journal.ppat.1006698 (2017).

10. Lau, S.K. *et al.* Severe acute respiratory syndrome (SARS) coronavirus ORF8 protein is acquired from SARS-related coronavirus from greater horseshoe bats through recombination. *J. Virol.* **89**, 10532-10547; doi:10.1128/JVI.01048-15 (2015).
11. Wang, L. *et al.* Discovery and genetic analysis of novel coronaviruses in least horseshoe bats in southwestern China. *Emerg. microbes & infect.* **6**, e14; doi:10.1038/emi.2016.140 (2017).
12. Hu, D. *et al.* Genomic characterization and infectivity of a novel SARS-like coronavirus in Chinese bats. *Emerg. microbes & infect.* **7**, 154; doi:10.1038/s41426-018-0155-5 (2018).
13. Lee, S. *et al.* Genetic characteristics of coronaviruses from Korean bats in 2016. *Microb. Ecol.* **75**, 174-182; doi:10.1007/s00248-017-1033-8 (2018).
14. Kim, Y. *et al.* Complete genome analysis of a SARS-like bat coronavirus identified in the Republic of Korea. *Virus genes* **55**, 545-549; doi:10.1007/s11262-019-01668-w (2019).

**Supplementary Figure S1. Model performance in geographic space on training data. Ecological niche of bat viruses related to SARS-CoV (SCoVrCs).**

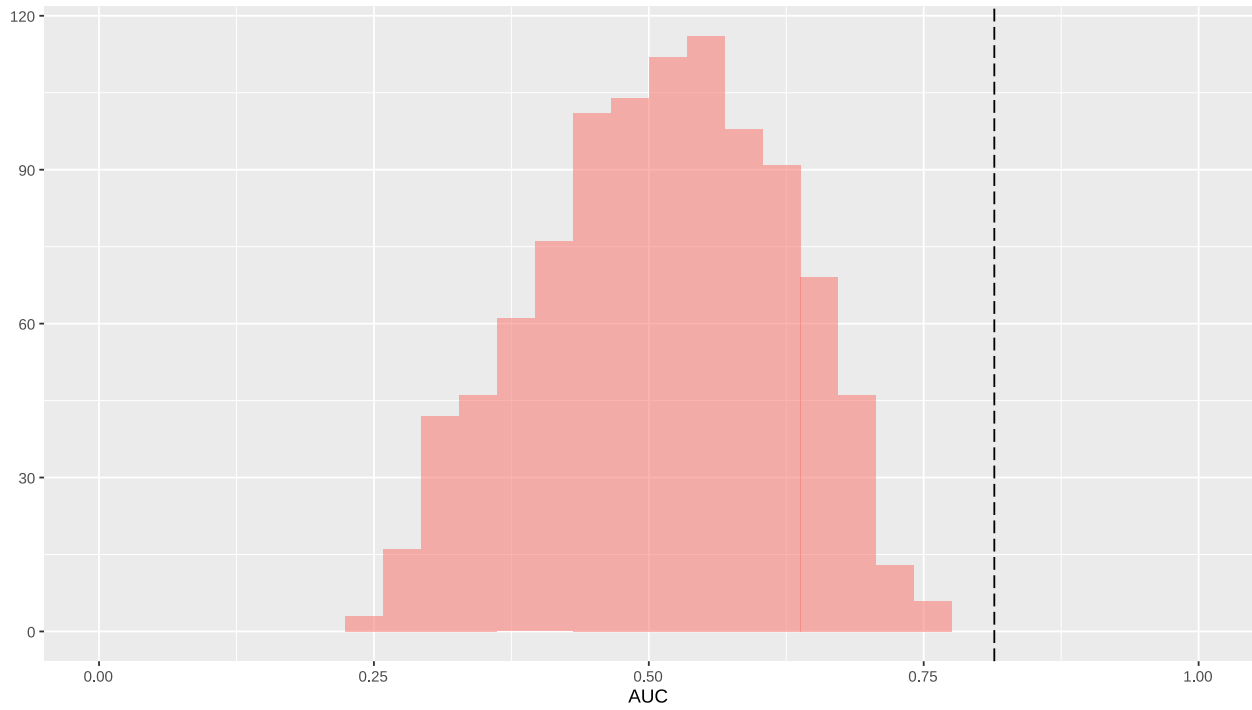

Figure S1 - 1 / 1



**Supplementary Figure S2. Model performance in geographic space on training data. Ecological niches of bat viruses closely related to SARS-CoV-2 (SCoV2rCs) predicted using 4 points (data set A).**

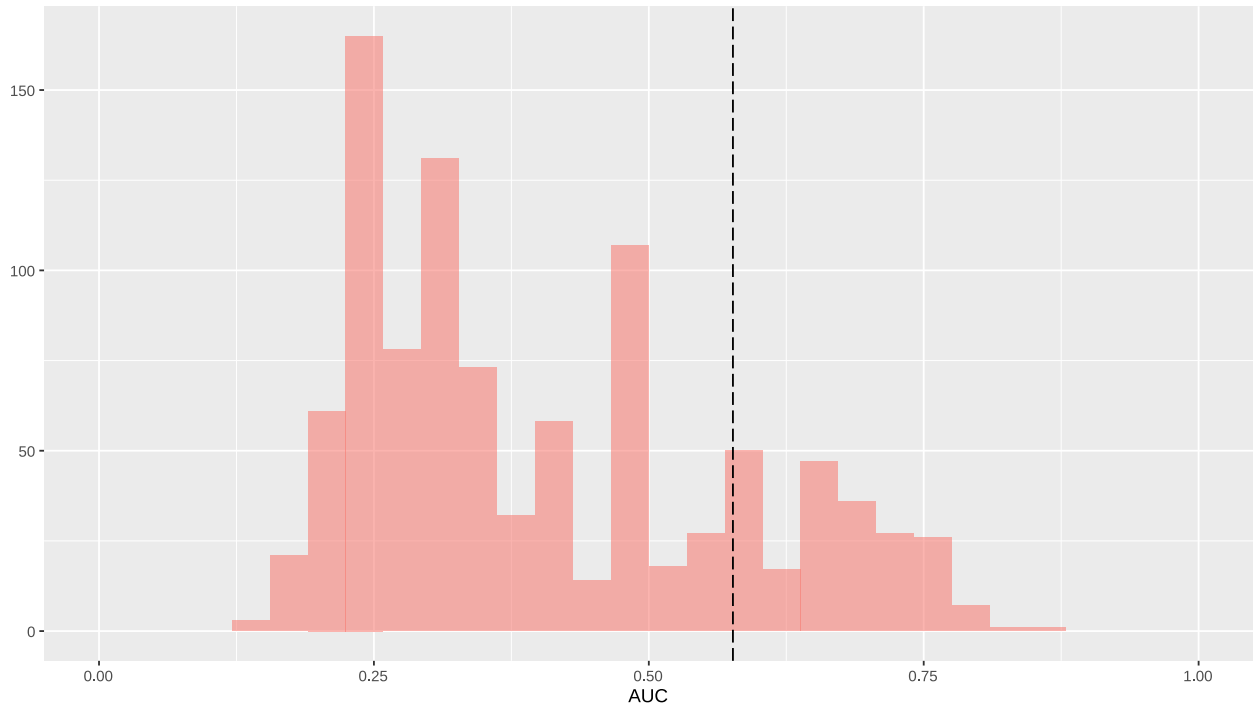

Figure S2 - 1 / 1

**Supplementary Figure S3. Model performance in geographic space on training data. Ecological niches of bat viruses closely related to SARS-CoV-2 (SCoV2rCs) predicted using 21 points (data set B).**

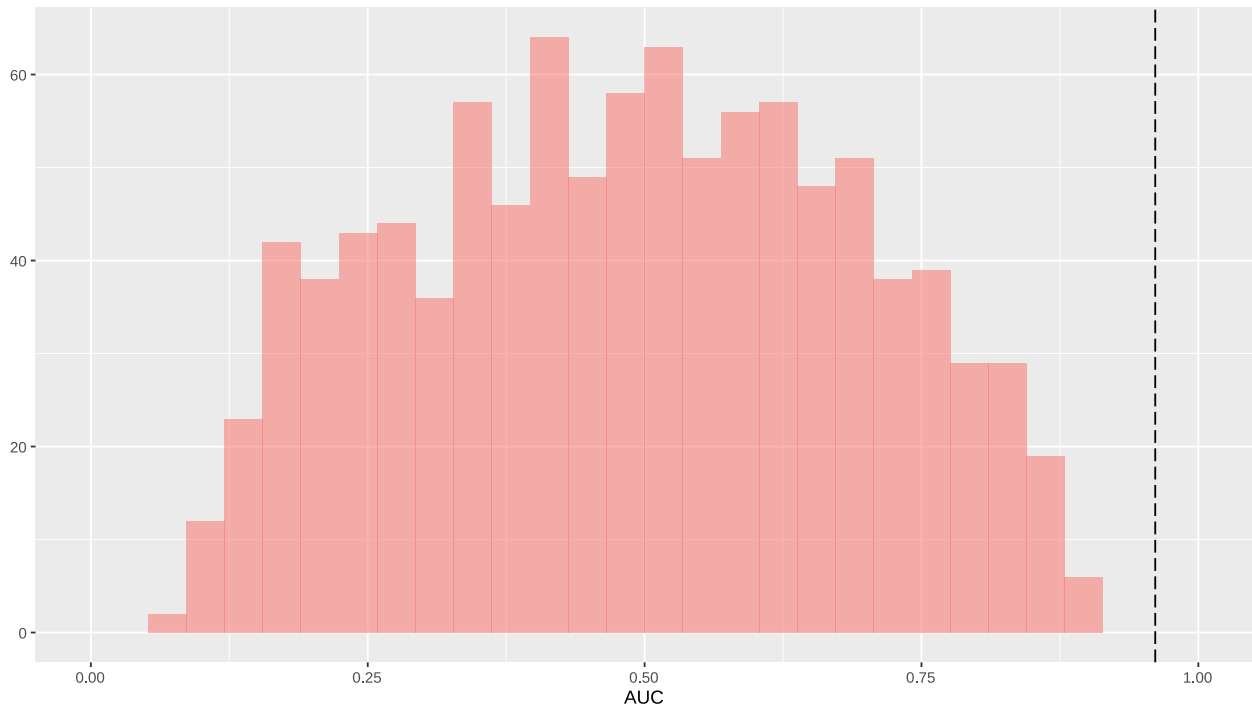

Supplement: 41598_2021_93738_MOESM1_ESM.pdf [file 41598_2021_93738_MOESM1_ESM.pdf]
